# Left ventricular dimensions predict risk of appropriate shocks but not mortality in cardiac resynchronization therapy-defibrillator recipients with left bundle-branch block and non-ischemic cardiomyopathy

Evan C. Adelstein\*, David Schwartzman, Sandeep Jain, Raveen Bazaz, Norman C. Wang, and Samir Saba

Heart and Vascular Institute, University of Pittsburgh, 200 Lothrop Str. PUH B535 Pittsburgh, PA, USA

Received 24 June 2016; accepted after revision 19 September 2016; online publish-ahead-of-print 17 November 2016

## Aims

Patients with non-ischaemic cardiomyopathy (NICM) and left bundle-branch block (LBBB) often benefit markedly from cardiac resynchronization therapy (CRT). Cardiac resynchronization therapy responders have a lower risk of appropriate device shocks from CRT-defibrillators (CRT-D) than do non-responders. Larger baseline left ventricular (LV) dimensions may be associated with less CRT response and thus greater risk of appropriate shocks.

## Methods and results

We analysed all ( $n = 249$ ; 55% female) primary prevention CRT-D recipients at our institution with LBBB, NICM, and measured LV dimensions prior to device implant for the outcomes of (i) appropriate shocks, (ii) any appropriate tachyarrhythmia therapies, and (iii) risk of death, transplant, or left ventricular assist device (LVAD). During 59 months (interquartile range 21.5–91.5) follow-up, 19 (8%) patients received  $\geq 1$  appropriate shock, and 67 (27%) patients died, received a transplant, or required LVAD. Receiver-operating characteristic analysis of LV end-diastolic diameter (LVEDD) per meter height vs. appropriate shock(s) revealed an area under the curve of 0.75 (95% CI 0.65–0.85;  $P < 0.001$ ). No patient with indexed LVEDD  $< 3.36$  cm/m ( $n = 76$ ) received a shock. There was no statistically significant difference in risk of death, transplant, or LVAD (corrected HR 1.67, 95% CI 0.90–3.03;  $P = 0.103$ ) in patients with indexed LVEDD above this cut-off compared to those with smaller dimension. Among 102 patients with paired quantitative echocardiograms, there was no difference in LVEF change between patients with indexed LVEDD  $< 3.36$  cm/m ( $n = 27$ ; median 11%) and larger ( $n = 75$ ; median 14%).

## Conclusion

Patients with LVEDD  $< 3.36$  cm/m height prior to CRT-D implant in the setting of NICM and LBBB have minimal risk of appropriate shocks but similar risk of death, transplant- and LVAD and similar extent of LV functional improvement as patients with larger LVEDD. CRT-pacemakers may be appropriate in such patients.

## Keywords

Non-ischemic cardiomyopathy • Cardiac resynchronization • Left bundle-branch block • Implantable cardioverter-defibrillator • Echocardiography

\* Corresponding author. Tel: +1 412 647 6272; fax +1 412 647 7979. E-mail address: adelsteinec@upmc.edu

Published on behalf of the European Society of Cardiology. All rights reserved. © The Author 2016. For Permissions, please email: journals.permissions@oup.com.

## What's new?

- Patients with left bundle-branch block and non-ischemic cardiomyopathy who have a baseline left ventricular end-diastolic dimension  $<3.36$  cm/m height have minimal risk of appropriate device shocks after receiving primary prevention cardiac-resynchronization therapy-defibrillators.
- The low risk of ventricular arrhythmias in patients with left ventricular end-diastolic dimension  $<3.36$  cm/m height compared to patients with larger ventricles is not related to baseline comorbid conditions or differences in reverse remodelling after receiving cardiac resynchronization therapy, and both groups have similar risk of death, transplant, or left ventricular assist device.

## Introduction

Cardiac resynchronization therapy (CRT) reduces heart failure (HF) morbidity and mortality in patients with severe left ventricular (LV) dysfunction and abnormal LV intraventricular conduction.<sup>1,2</sup> Patients with left bundle-branch block (LBBB)<sup>3</sup> and non-ischaemic cardiomyopathy<sup>4,5</sup> derive particular benefit from CRT, manifesting profound improvement in clinical status and LV function. However, some studies have shown that marked baseline LV dilatation portends less favourable outcomes after CRT,<sup>5</sup> whereas randomized trials have paradoxically excluded patients without significant LV dilatation.<sup>1,2</sup> Patients who exhibit marked reverse remodelling with CRT are known to have lower ongoing risk of ventricular arrhythmias,<sup>6</sup> yet *a priori* identification of very low-risk patients has been difficult. Identifying CRT candidates who are at low risk for ventricular arrhythmias may lead to better outcomes if implanted with CRT-P instead of CRT-D, given the risk of inappropriate shocks, lead-related mechanical complications,<sup>7</sup> and increased cost with the latter.<sup>8</sup>

We examined whether LV dimensions prior to CRT are associated with appropriate shocks subsequent to CRT-D implant, hypothesizing that smaller LV dimensions may be associated with less risk. We chose a relatively homogeneous population comprising patients with strictly defined LBBB<sup>9</sup> and non-ischaemic cardiomyopathy to minimize potential confounders that may impact CRT response, including ischemic scar burden<sup>4</sup> and QRS pattern.<sup>3</sup>

## Methods

### Patient selection

We included all patients from a prospectively maintained CRT-D database at the University of Pittsburgh who fulfilled the following criteria: (i) LVEF  $\leq 35\%$ , (ii) strictly defined LBBB, (iii) primary prevention indication for a defibrillator, (iv) non-ischaemic cardiomyopathy, and (v) measured LV dimensions prior to implant. The database includes 1742 CRT-D recipients, of whom 1016 were excluded because of ischemic cardiomyopathy. An additional 328 non-ischaemic cardiomyopathy patients were excluded because of baseline right bundle-branch block, non-specific intraventricular conduction delay, or complete heart block, 35 were excluded because of prior sustained ventricular arrhythmias, and 82 were excluded because there were no available baseline LV dimensions at the University of Pittsburgh Medical Center.

left bundle-branch block was defined as a QRS duration  $\geq 130$  ms in women and  $\geq 140$  ms in men, a QS or rS complex in lead V<sub>1</sub>, and notching of the QRS complex in at least two contiguous leads involving I and aVL, V<sub>1</sub> and V<sub>2</sub>, or V<sub>5</sub> and V<sub>6</sub>.<sup>9</sup> Non-ischaemic cardiomyopathy was defined as LVEF  $\leq 35\%$  in the absence of (i) prior coronary revascularization, (ii) stenosis  $\geq 80\%$  in a major epicardial coronary artery, and (iii) definitive history of myocardial infarction with corroborating non-invasive imaging.<sup>6</sup> Patients had neither a history of aborted cardiac arrest nor spontaneous ventricular arrhythmias lasting  $\geq 30$  s or causing hemodynamic collapse. As the primary exposure for the study was LV dimension, we included only patients who underwent transthoracic echocardiography at the hospitals of the University of Pittsburgh Medical Center.

### Echocardiography

Echocardiograms were performed at baseline (median 1 month prior to CRT) and  $\geq 3$  months (median 17 months) after CRT implant. Echocardiograms were performed by sonographers and interpreted by cardiologists board-certified in echocardiography. LV dimensions were measured in the parasternal long axis view according to standard techniques.<sup>10</sup> Patients with echocardiograms available in digital format also underwent offline analysis, using Simpson's biplane technique in the apical 4- and 2-chamber views to measure LV end-diastolic and end-systolic volumes; these values were used to calculate LVEF.

### Device and heart failure therapy

Patients were implanted with CRT-D between April 2002 May 2016 at one of the hospitals of the University of Pittsburgh Medical Center, including a high-voltage lead in the right ventricular apex, a standard pacing lead in the right atrial free wall, and a LV lead preferentially placed in a posterolateral or lateral coronary vein. Devices were programmed at the discretion of the implanting physician. Anti-tachycardia pacing during charging was universally activated in the VF zone when this feature became available, and tachycardia detection and therapy was programmed and reprogrammed according to published guidelines.<sup>11</sup>

Patients received maximally tolerated guideline-directed medical therapy with  $\beta$ -adrenergic antagonists and inhibitors of the renin-angiotensin-aldosterone system. Medications were recorded at the time of device implant.

### Study outcomes and statistical analysis

The outcome measure of primary interest in this exploratory analysis was the incidence and timing of first appropriate device shock. Additional measures of interest were time to any appropriate tachyarrhythmia therapy and survival free from transplant or left ventricular assist device (LVAD). Electrograms from all device shocks were examined by an electrophysiologist and confirmed to be appropriate or inappropriate. We also assessed absolute change in LVEF and relative change in LV end-systolic volume in the subset of patients with paired echocardiograms before and  $\geq 3$  months after CRT implant.<sup>10</sup>

We initially performed receiver-operating characteristic analysis to examine the relationship between LV end-diastolic dimension (LVEDD) indexed to height in meters and any appropriate shocks. Because no patient with indexed LVEDD  $<3.36$  cm/m received an appropriate shock, and our primary goal was to identify a group of patients at particularly low risk of ventricular arrhythmias, we divided the cohort into two groups: (i) indexed LVEDD  $<3.36$  cm/m and (ii) LVEDD  $\geq 3.36$  cm/m. Continuous variables were assessed for normal distribution and were compared using Student's *t*-test if normally distributed and the Mann-Whitney *U* test if otherwise. Discrete variables were compared using Fisher's exact test or  $\chi^2$  test, as appropriate. Kaplan-Meier curves were constructed for time-dependent outcomes and were compared using the

**Table 1** Baseline characteristics

| Clinical Characteristic            | Overall Cohort (n = 249) | LVEDD <3.36 cm/m (n = 76) | LVEDD ≥3.36 cm/m (n = 173) | P-value* |
|------------------------------------|--------------------------|---------------------------|----------------------------|----------|
| Age, y                             | 64 (54, 74)              | 69 (59, 75)               | 61 (54, 73)                | 0.02     |
| Male                               | 112 (45%)                | 36 (47%)                  | 76 (44%)                   | 0.68     |
| NYHA class                         |                          |                           |                            | 0.14     |
| 2                                  | 33 (13%)                 | 15 (20%)                  | 18 (10%)                   |          |
| 3                                  | 205 (82%)                | 58 (76%)                  | 147 (85%)                  |          |
| 4                                  | 11 (4%)                  | 3 (4%)                    | 8 (5%)                     |          |
| Diabetes                           | 62 (25%)                 | 23 (30%)                  | 39 (23%)                   | 0.21     |
| Paroxysmal AF                      | 46 (19%)                 | 17 (22%)                  | 29 (17%)                   | 0.29     |
| Permanent AF                       | 14 (6%)                  | 7 (9%)                    | 7 (4%)                     | 0.13     |
| Glomerular filtration rate, mL/min | 69 ± 25                  | 68 ± 25                   | 69 ± 26                    | 0.76     |
| QRS duration, ms                   | 170 (156, 184)           | 164 (152, 172)            | 176 (161, 188)             | <0.001   |
| β-blocker                          | 221 (89%)                | 69 (91%)                  | 152 (88%)                  | 0.66     |
| ACE-I or ARB                       | 214 (86%)                | 69 (91%)                  | 145 (84%)                  | 0.17     |
| Loop diuretic                      | 177 (71%)                | 47 (62%)                  | 130 (76%)                  | 0.03     |
| Statin                             | 112 (45%)                | 42 (55%)                  | 70 (41%)                   | 0.04     |
| Digoxin                            | 80 (32%)                 | 28 (24%)                  | 62 (36%)                   | 0.08     |
| Aldosterone antagonist             | 66 (27%)                 | 16 (21%)                  | 50 (29%)                   | 0.22     |
| LVEF, %                            | 22 (17, 27)              | 27 (22, 32)               | 20 (16, 22)                | <0.001   |
| LVEDD, cm                          | 6.1 ± 1.1                | 5.2 ± 0.5                 | 6.6 ± 0.9                  | <0.001   |
| LVESD, cm                          | 5.3 ± 1.2                | 4.3 ± 0.6                 | 5.7 ± 1.1                  | <0.001   |
| LVEDV, mL <sup>a</sup>             | 177 (135, 223)           | 127 (103, 166)            | 198 (158, 235)             | <0.001   |
| LVESV, mL <sup>a</sup>             | 129 (96, 170)            | 94 (74, 119)              | 150 (114, 194)             | <0.001   |
| VF rate cut-off, bpm               | 210 (200, 220)           | 210 (200, 220)            | 210 (200, 220)             | 0.80     |
| VT rate, cut-off, bpm              | 182 (176, 187)           | 182 (176, 188)            | 182 (176, 187)             | 0.68     |

<sup>a</sup>120 patients had volumetric analysis of baseline echocardiogram, 40 in the LVEDD <3.36 cm/m group and 80 in the LVEDD ≥3.36 cm/m group. \*P-value reflects comparison between patients with indexed LVEDD <3.36 cm/m and ≥3.36 cm/m.

log-rank test. Baseline intrinsic variables differing between the groups with a P-value <0.1 were entered into a multivariate Cox regression model, in addition to variables identified *a priori* that were deemed to be important predictors of post-CRT outcomes. P-values ≤0.05 were considered statistically significant. SPSS version 23.0 (IBM, Inc., Armonk, NY) was used for statistical analyses.

## Results

### Patient characteristics

The study cohort included 249 patients, almost evenly split between males and females. Additional baseline characteristics are listed in Table 1. Baseline LVEDD was normally distributed between 3.7 and 10.2 cm, with a mean of 6.1 ± 1.1. Indexing LVEDD to height in meters, patients' dimensions were non-parametrically distributed between 2.06–5.90 cm/m, with a median of 3.58 and interquartile range of 3.28–3.96. During a median of 59 months (interquartile range 21.5–91.5) follow-up, 19 patients (8%) received an appropriate shock. Initial receiver operating characteristic analysis of LVEDD/m vs. any appropriate shock yielded an area under the curve of 0.75 (95% CI 0.65–0.85; P < 0.001). None of the 76 patients with a baseline indexed LVEDD <3.36 cm/m (or 96 patients with LVEDD <5.8 cm) received an appropriate shock (Figure 1). This LVEDD also corresponded to the lowest tertile cut-off.

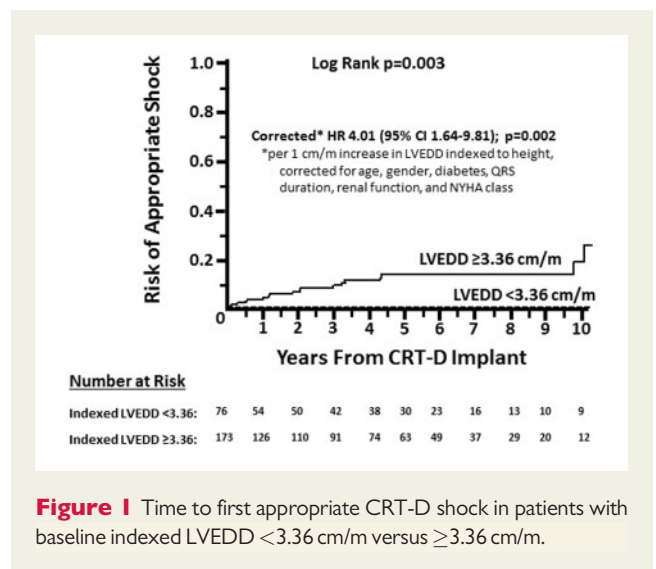

**Figure 1** Time to first appropriate CRT-D shock in patients with baseline indexed LVEDD <3.36 cm/m versus ≥3.36 cm/m.

The 76 patients with indexed LVEDD <3.36 cm/m and 173 patients with LVEDD ≥3.36 cm/m are compared in Table 1. Patients with indexed LVEDD <3.36 cm/m were older, had a narrower QRS complex, were less likely to be prescribed loop diuretics, and had a higher baseline LVEF. The groups were otherwise similar, including programmed rate cut-offs for VT and VF zones, in particular.

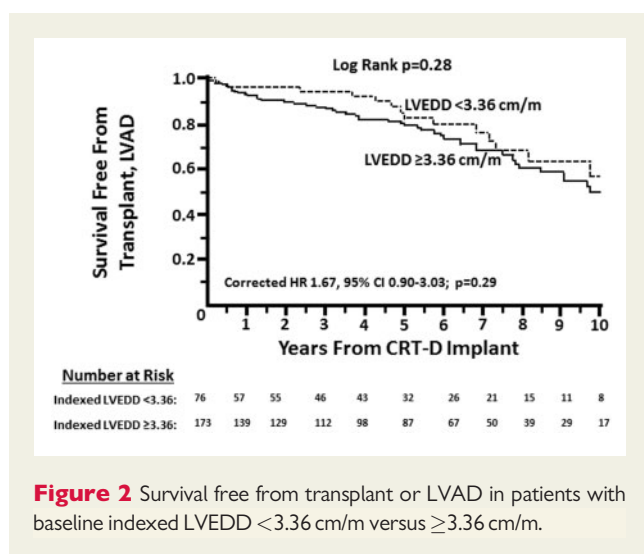

**Figure 2** Survival free from transplant or LVAD in patients with baseline indexed LVEDD <3.36 cm/m versus ≥3.36 cm/m.

## Device tachyarrhythmia therapies

The unadjusted risk of at least 1 appropriate shock was significantly greater as indexed LVEDD increased (HR 3.62 per 1 cm/m increase, 95% CI 1.78–7.37;  $P < 0.001$ ). The hazard ratio per 1 cm/m increase in indexed LVEDD was 4.01 (95% CI 1.64–9.81;  $P = 0.002$ ) when corrected for age, gender, diabetes, QRS duration, renal function, and NYHA class.

The unadjusted risk of anti-tachycardia pacing in patients with indexed LVEDD <3.36 cm/m compared to ≥3.36 cm/m was 1.29 (95% CI 0.72–2.33;  $P = 0.39$ ). Adjusting for age, gender, diabetes, QRS duration, renal function, and NYHA class did not appreciably change this finding (hazard ratio 1.82, 95% CI 0.87–3.82;  $P = 0.11$ ). The corresponding unadjusted risk of any appropriate tachyarrhythmia therapy was significantly greater in the group with indexed LVEDD <3.36 cm/m (hazard ratio 1.75, 95% CI 1.07–2.88;  $P = 0.026$ ), which corrected to 1.94 (95% CI 1.05–3.59;  $P = 0.034$ ) on multivariate analysis.

## Survival free from cardiac transplant or ventricular assist device

A total of 67 patients (27%) died ( $n = 52$ ), received a transplant ( $n = 7$ ), or required LVAD ( $n = 8$ ), including 15 (20%) patients with indexed LVEDD <3.36 cm/m and 52 (30%) patients with indexed LVEDD ≥3.36 cm/m. Overall survival free from transplant or LVAD was similar (Figure 2; HR 0.73, 95% CI 0.41–1.30;  $P = 0.29$ ). A multivariate Cox model incorporating age, gender, renal function, diabetes, NYHA class, and QRS duration yielded similar findings (HR 1.67, 95% CI 0.90–3.03;  $P = 0.103$ ). Using a continuous variable for indexed LVEDD rather than a dichotomous cut-off value in this model also demonstrated no statistically significant difference in survival free from transplant or VAD per 1 cm/m increase (corrected HR 1.57, 95% CI 0.98–2.53;  $P = 0.063$ ).

## Echocardiography

A follow-up echocardiogram with paired volumetric data was available in 102 patients (41%), including 27 (36%) with indexed LVEDD <3.36 cm/m and 75 (43%) with indexed LVEDD ≥3.36 cm/m.

Overall, LVEF increased by 14% and LVESV decreased 38% from baseline, with post-CRT measurements significantly different from pre-CRT measurements ( $P < 0.001$ ). The absolute LVEF increase was identical between patients with indexed LVEDD <3.36 and ≥3.36 (median 11% vs. 14%, respectively;  $P = 0.32$ ) and the relative LVESV decrease was also similar (median –40% vs. –37%, respectively;  $P = 0.38$ ).

## Discussion

In this large, single centre registry study, smaller LV dimensions prior to CRT-D implant were associated with lower risk of appropriate device shocks in patients with non-ischaemic cardiomyopathy, LBBB, and no prior sustained ventricular arrhythmias. In particular, patients with indexed LVEDD <3.36 cm/m height had no appropriate device shocks. Despite the significant difference in risk of appropriate shocks based upon baseline LVEDD, there was no difference in survival free from transplant or LVAD, and among patients with paired echocardiograms before and after CRT, there was no quantitative difference in reverse remodelling or LV functional improvement based upon baseline LVEDD.

Cardiomyopathy patients with LBBB rather than non-specific intraventricular conduction delay or right bundle-branch block derive the greatest benefit from CRT,<sup>3</sup> a finding reflected in current practice guidelines.<sup>12</sup> Non-ischaemic cardiomyopathy is also associated with more reverse remodelling, greater LV functional improvement, and better survival outcomes compared to patients with ischaemic heart disease.<sup>4</sup> Furthermore, patients who experience significant reverse remodelling with CRT are at lower risk of ventricular arrhythmias,<sup>6</sup> and LV reverse remodelling is associated with long-term survival in CRT recipients.<sup>13</sup> It is in this context that we examined outcomes in patients with non-ischaemic cardiomyopathy, strictly defined LBBB,<sup>9</sup> and a primary prevention indication for a CRT-D, postulating that LV dilatation may be related to risk of appropriate device shocks. We examined patients with non-ischaemic cardiomyopathy in order to remove the element of ischaemic scar burden from ongoing risk of ventricular arrhythmias. We also sought to study a population of 'ideal' CRT candidates and therefore excluded patients with non-LBBB conduction abnormalities or atrioventricular block requiring pacing. As such, our study population is fairly homogenous compared to the majority of CRT datasets described in the literature.

Patients without significant LV dilatation have largely been excluded from larger CRT clinical trials; CARE-HF<sup>2</sup> excluded patients with LVEDD <3.0 cm/m height, and COMPANION<sup>1</sup> excluded patients with LVEDD <6.0 cm. COMPANION included both CRT-D and CRT-pacemakers, and by excluding patients with less severe LV dilatation who were possibly less likely to benefit from a defibrillator, it may have overestimated the survival benefit of CRT-D vs. CRT-pacemakers.

Baseline LV dilatation has been associated with worse outcomes after CRT, although our study is the first to our knowledge to examine specifically the relationship between LV dimensions and outcomes in patients with NICM and LBBB. Rickard et al.<sup>14</sup> found an inverse relationship between baseline LVEDD and LVEF improvement after CRT, although there was significant LVEF improvement across the spectrum of LV dimensions. Furthermore, mortality

increased as LV dimensions increased. However, no tachyarrhythmia therapy data were included, 58% of patients had ischaemic cardiomyopathy, and only 39% had LBBB. Carluccio *et al.* found an inverse relationship between baseline LV end-systolic volume index and extent of LVEF improvement after CRT and a direct relationship between baseline LV volume and HF events.<sup>15</sup> Among pacemaker-dependent patients without coronary artery disease, LVEF normalization after CRT upgrade has been observed more commonly in those with less baseline LV dilatation.<sup>16</sup> A post-hoc analysis of MADIT-CRT also showed that patients who received appropriate shocks demonstrated greater baseline LV dilatation.<sup>17</sup> The disconnect between shocks and survival free from transplant or LVAD may be explained by prevention of sudden death in patients with larger LV dimensions, shifting the cause of death towards progressive HF, which may be similar regardless of LV dimensions, as evidenced by similar degrees of LV reverse remodelling and LV functional improvement.

The pathophysiologic basis for our findings is likely multifactorial. LV dilatation is the final common pathway for multiple processes that cause cardiomyopathy and is known to increase arrhythmia risk. Alterations in the expression of connexins and stretch-mediated changes in ion channel function have been reported in the setting of LV dilatation.<sup>18</sup> Smaller baseline dimensions may reflect less interstitial fibrosis<sup>19</sup> and therefore less available substrate for malignant re-entrant ventricular arrhythmias. This relationship may apply only to patients without coronary artery disease because denser, less patchy myocardial scar from prior infarction may provide the substrate for re-entry regardless of LV dimensions in patients with ischaemic cardiomyopathy. Among patients with ischaemic cardiomyopathy in our centre's database, we found no discrete cut-off LVEDD below which the risk of appropriate shocks is zero (data not shown). These findings support a study by Witt *et al.* in which only patients with ischaemic cardiomyopathy derived survival benefit with CRT-D over CRT-pacemakers.<sup>20</sup>

Our data suggest that CRT-pacemakers may be a viable alternative to CRT-D in non-ischaemic HF patients receiving CRT for primary prevention with LBBB and without significant LV dilatation because of the low or absent risk of malignant ventricular arrhythmias. CRT-pacemakers do have several advantages over CRT-D. There is no risk of inappropriate shocks with CRT-pacemakers, and pacing leads have a better track record of reliability compared to defibrillator leads, some of which have been subjected to class I Food and Drug Administration recalls.<sup>7</sup> Furthermore, the risks of infection may be lower with the smaller device size of CRT-pacemakers, and CRT-D devices also cost significantly more than CRT-pacemakers.<sup>8</sup>

## Limitations

As the present study was retrospective and did not prospectively evaluate the hypothesis that smaller LV dimensions are associated with lower risk of appropriate shocks, its conclusions are hypothesis-generating only. Measurement of LV dimensions does not take into account non-homogeneous LV geometry, although difficulty in delineating apical endocardium may render volume measurements more error-prone than measurement of linear dimensions. Paired echocardiograms were only available in less than half our population, representing what may be a biased subset of patients. Only overall mortality was described, although there would be no reason to suspect that non-cardiac mortality would be preferentially segregated to a group of patients with larger or smaller LV dimensions. While tachyarrhythmia

therapy was not standardized, a small group of physicians performed all implants and follow-up care, suggesting that there was no bias across patients with differing baseline LV dimensions. The lack of significant difference in survival free from transplant or LVAD may be partly the result of underpowering for this endpoint. Finally, we do not have extensive MRI data regarding evidence of myocardial fibrosis in this patient population. Therefore, we may only speculate as to any possible relationship between LV dimension and myocardial fibrosis.

## Conclusions

In primary prevention CRT-D recipients without coronary artery disease and with strictly defined LBBB, smaller baseline LVEDD is associated with lower risk of subsequent appropriate device shocks but no difference in survival free from transplant or VAD. Since no shocks were observed in patients with indexed LVEDD <3.36 cm/m, CRT-pacemakers may be a reasonable alternative in appropriately selected patients.

**Conflicts of interest:** none declared.

## References

- Bristow MR, Saxon LA, Boehmer J, Krueger S, Kass DA, De Marco T *et al.* Cardiac-resynchronization therapy with or without an implantable defibrillator in advanced chronic heart failure. *N Engl J Med* 2004;**350**:2140–50.
- Cleland JG, Daubert JC, Erdmann E, Freemantle N, Gras D, Kappenberger L *et al.* The effect of cardiac resynchronization on morbidity and mortality in heart failure. *N Engl J Med* 2005;**352**:1539–49.
- Zareba W, Klein H, Cygankiewicz I, Hall WJ, McNitt S, Brown M *et al.* Effectiveness of cardiac resynchronization therapy by QRS morphology in the Multicenter Automatic Defibrillator Implantation Trial-Cardiac Resynchronization Therapy (MADIT-CRT). *Circulation* 2011;**123**:1061–72.
- Adelstein EC, Tanaka H, Soman P, Miske G, Haberman SC, Saba SF *et al.* Impact of scar burden by single-photon emission computed tomography myocardial perfusion imaging on patient outcomes following cardiac resynchronization therapy. *Eur Heart J* 2011;**32**:93–103.
- van Bommel RJ, Bax JJ, Abraham WT, Chung ES, Pires LA, Tavazzi L *et al.* Characteristics of heart failure patients associated with good and poor response to cardiac resynchronization therapy: A PROSPECT (Predictors of Response to CRT) sub-analysis. *Eur Heart J* 2009;**30**:2470–7.
- Adelstein E, Schwartzman D, Bazaz R, Jain S, Gorcsan J 3rd, Saba S. Outcomes in pacemaker-dependent patients upgraded from conventional pacemakers to cardiac resynchronization therapy-defibrillators. *Heart Rhythm* 2014;**11**:1008–14.
- Liu J, Brumberg G, Rattan R, Jain S, Saba S. Class I recall of defibrillator leads: a comparison of the Sprint Fidelis and Riata families. *Heart Rhythm* 2012;**9**:1251–5.
- Lindvall C, Chatterjee NA, Chang Y, Chernack B, Jackson VA, Singh JP *et al.* National trends in the use of cardiac resynchronization therapy with or without implantable cardioverter-defibrillator. *Circulation* 2016;**133**:273–281.
- Strauss DG, Selvester RH, Wagner GS. Defining left bundle branch block in the era of cardiac resynchronization therapy. *Am J Cardiol* 2011;**107**:927–34.
- Lang RM, Badano LP, Mor-Avi V, Afilalo J, Armstrong A, Ernande L *et al.* Recommendations for cardiac chamber quantification by echocardiography in adults: An update from the American Society of Echocardiography and the European Association of Cardiovascular Imaging. *Eur Heart J Cardiovasc Imaging* 2015;**16**:233–70.
- Wilkoff BL, Fauchier L, Stiles MK, Morillo CA, Al-Khatib SM, Almendral J *et al.* 2015 HRS/EHRA/APHS/OLAECE expert consensus statement on optimal implantable cardioverter-defibrillator programming and testing. *Europace* 2016;**18**:159–83.
- Tracy CM, Epstein AE, Darbar D, DiMarco JP, Dunbar SB, Estes NA 3rd *et al.* 2012 ACCF/AHA/HRS Focused Update of the 2008 Guidelines for Device-Based Therapy of Cardiac Rhythm Abnormalities: a report of the American College of Cardiology Foundation/American Heart Association Task Force on Practice Guidelines and the Heart Rhythm Society. *Circulation* 2012;**126**:1784–800.
- Yu CM, Bleeker GB, Fung JW, Schalij MJ, Zhang Q, van der Wall EE *et al.* Left ventricular reverse remodeling but not clinical improvement predicts long-term survival after cardiac resynchronization therapy. *Circulation* 2005;**112**:1580–6.
- Rickard J, Brennan DM, Martin DO, Hsieh E, Tang WH, Lindsay BD *et al.* The impact of left ventricular size on response to cardiac resynchronization therapy. *Am Heart J* 2011;**162**:646–53.

15. Carluccio E, Biagioli P, Alunni G, Murrone A, Pantano P, Biscottini E et al. Presence of extensive LV remodeling limits the benefits of CRT in patients with intraventricular dyssynchrony. *JACC Cardiovasc Imaging* 2011;**4**:1067–76.
16. Adelstein E, Schwartzman D, Gorcsan J 3rd, Saba S. Predicting hyperresponse among pacemaker-dependent nonischemic cardiomyopathy patients upgraded to cardiac resynchronization. *J Cardiovasc Electrophysiol* 2011;**22**:905–11.
17. Sood N, Ruwald AC, Solomon S, Daubert JP, McNitt S, Polonsky B et al. Association between myocardial substrate, implantable cardioverter defibrillator shocks and mortality in MADIT-CRT. *Eur Heart J* 2014;**35**:106–15.
18. Aiba T, Tomaselli GF. Electrical remodeling in the failing heart. *Curr Opin Cardiol* 2010;**25**:29–36.
19. Gulati A, Jabbar A, Ismail TF, Guha K, Khwaja J, Raza S et al. Association of fibrosis with mortality and sudden cardiac death in patients with nonischemic dilated cardiomyopathy. *JAMA* 2013;**309**:896–908.
20. Witt CT, Kronborg MB, Nohr EA, Mortensen PT, Gerdes C, Jensen HK et al. Adding the implantable cardioverter-defibrillator to cardiac resynchronization therapy is associated with improved long-term survival in ischaemic, but not in non-ischaemic cardiomyopathy. *Eurpace* 2016;**18**:413–9.

## EP CASE EXPRESS

doi:10.1093/europace/euw175

Online publish-ahead-of-print 11 October 2016

# Failure of an Implantable Defibrillator to detect transition from sinus tachycardia to slow ventricular tachycardia with 'Onset' discrimination algorithm activated

Anand D. Shah\*, Michael H. Hoskins, Michael S. Lloyd, and Jonathan J. Langberg

Division of Cardiology, Emory University School of Medicine, STE F414, 1364 Clifton Road, NE, Atlanta, GA 30322, USA

\* Corresponding author. Tel: +1 404 712 4942; fax: +1 404 712 4374. E-mail address: adshah7@emory.edu

A 74-year-old male with inotrope-dependent congestive heart failure (CHF) had recurrence of slow ventricular tachycardia (VT) (Panel A). Although this VT exceeded the programmed rate cutoff (Panel B), therapy was inhibited, because it did not exceed the change in rate criterion specified by the 'Onset' algorithm (Panel B, arrowhead). This algorithm withholds therapy when the change in rate is gradual. The nominal setting for this feature on Medtronic defibrillators requires the average cycle length of four consecutive beats to decrease by 81% for VT classification to occur. It is primarily meant to differentiate between sinus tachycardia and VT.

In patients who have a small difference in VT cycle length compared with sinus cycle length, this algorithm may lead to misclassification of VT and delay or the absence of appropriate therapy, especially when nominal settings are utilized. Patients with advanced cardiomyopathy may have high sinus rates as compensation for low cardiac output.

This is especially true in patients on inotropic therapy such as dobutamine. Additionally, these patients are more likely to have slow VT. Thus, a combination of high resting heart rate and slow VT, as might be encountered in the advanced heart failure population, should require careful assessment of 'onset' discriminator programming.

The full-length version of this report can be viewed at: <http://www.escardio.org/Guidelines-&-Education/E-learning/Clinical-cases/Electrophysiology/EP-Case-Reports>.

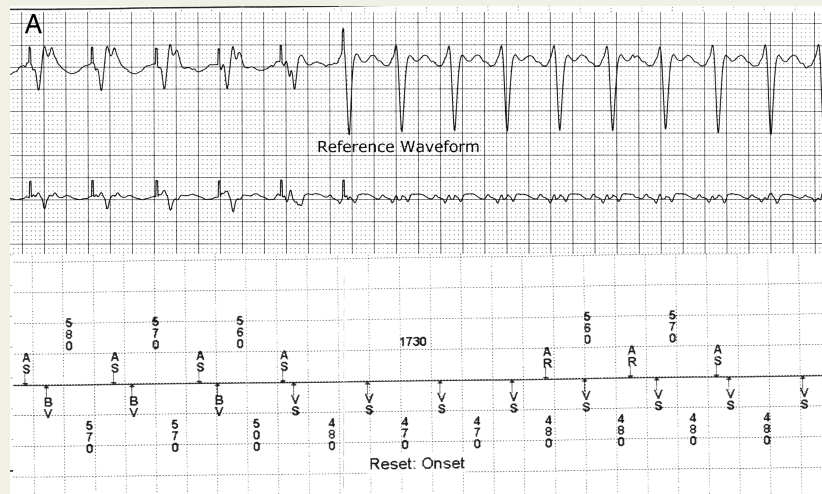

## B

### Episode Summary

Initial Type SVT - Onset (spontaneous)  
 Duration 4.5 min  
 AV Max Rate 105 bpm/162 bpm  
 V. Median 125 bpm (480 ms)  
 Activity at onset Rest, Sensor = 94 bpm

### Other Criteria Triggered

Onset

| Parameter Settings | Initial | Redetect | V. Interval (Rate) |
|--------------------|---------|----------|--------------------|
| VF On              | 24/32   | 9/12     | 320 ms (188 bpm)   |
| FVT via VT         |         |          | 400 ms (150 bpm)   |
| VT On              | 24      | 12       | 500 ms (120 bpm)   |
| Monitor Monitor    | 28      |          | 560 ms (107 bpm)   |

### PR Logic/Wavelet

| PR Logic/Wavelet | Other Enhancements |
|------------------|--------------------|
| AF/Afl           | Off                |
| Sinus Tach       | Off                |
| Other 1:1 SVTs   | Off                |
| Wavelet          | Off                |
| Template         | Off                |
| SVT V. Limit     | Off                |
|                  | High Rate Timeout  |
|                  | VF Zone Only       |
|                  | All Zones          |
|                  | RV Lead Noise      |
|                  | Timeout            |
|                  | On (81%)           |
|                  | On                 |
|                  | On+Timeout         |
|                  | 2 min              |
